# Supplementary material
Source: Springer Nature journal article supplement (https://www.springermedizin.de/resource/supplementary/12967_2014_1845_MOESM6_ESM.pdf/9574970)

**A**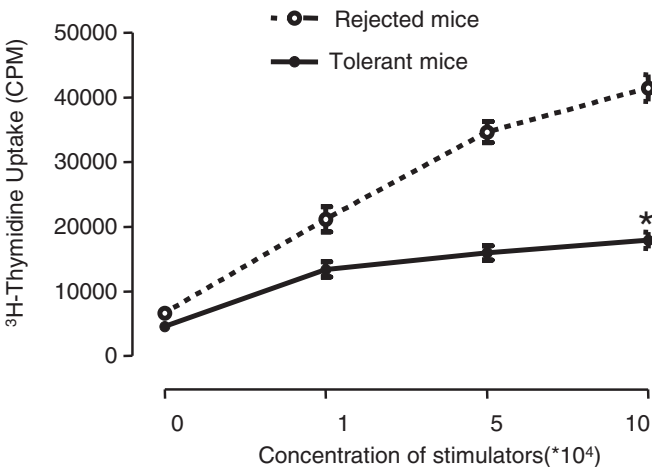**B**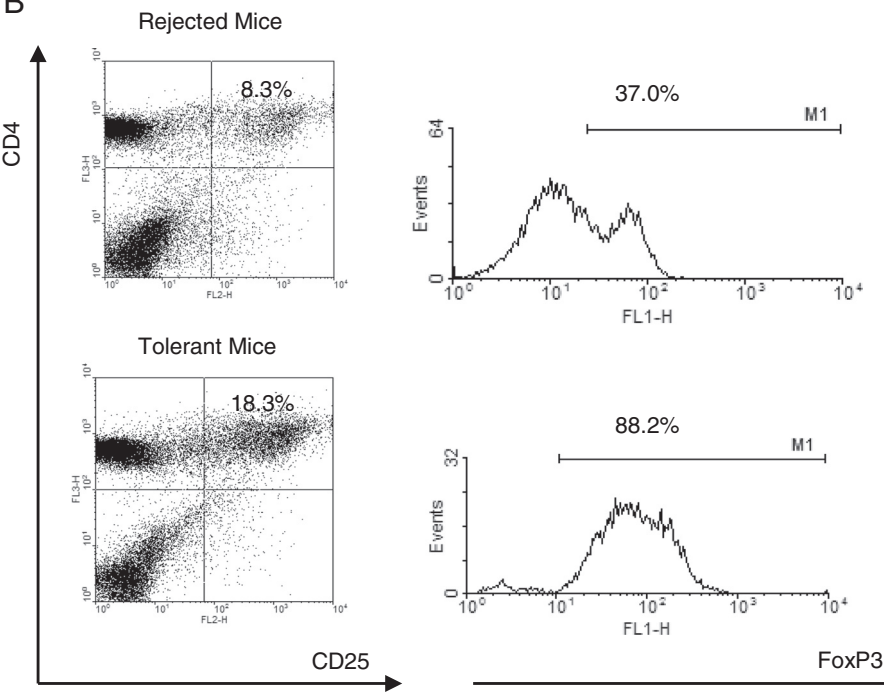

Supplement: MOESM6 [file 9574970]
